# Supplementary material for: Herausforderungen der Automation bei der quantitativen Auswertung von Leberbiopsien
Source: Springer Nature journal article supplement (doi:10.1007/s00292-024-01298-6), 2024-02-21
Supplement: MOESM1 [file 26759680]

Onlinezusatzmaterial:

Abb. S1 - S12

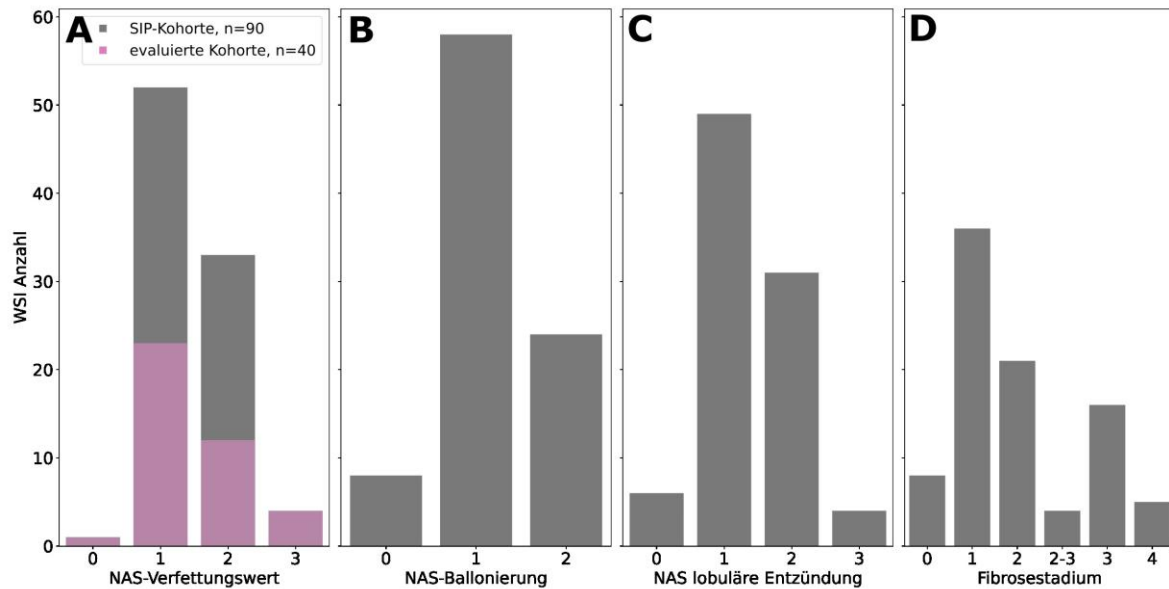

**Abb. S1: Charakterisierung der Dr. Senckenbergischen Institute für Pathologie (SIP)-Kohorte.** Die in A-D gezeigten Informationen wurden von der Befundung entnommen. In A wird der Anteil der evaluierten WSI in Lila hervorgehoben.

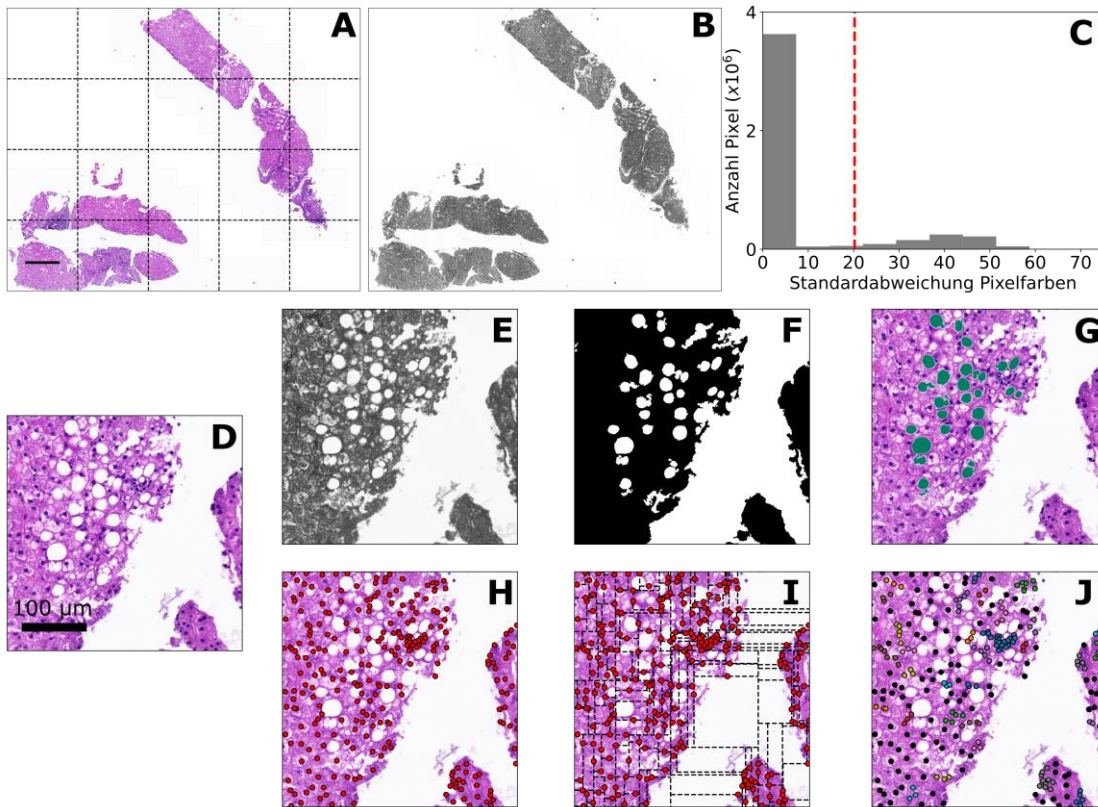

**Abb. S2: Übersicht der automatisierten Bildanalyse von H&E WSI.** **A** Das gesamte „whole slide image“ (WSI) wird als RGBA-Bild geöffnet in einer Auflösung von  $\sim 4,5 \mu\text{m}^2/\text{Pixel}$ . Anschließend wird das gesamte WSI, erneut, in der höchsten Auflösung, geöffnet und in Kacheln geteilt (siehe Schritt D). Die Maßstabsleiste zeigt  $500 \mu\text{m}$  an. **B** Für jeden Pixel des WSI in der kleineren Auflösung wird die Standardabweichung der Farbkanäle bestimmt. **C** Basierend auf dem Histogramm der Standardabweichungen aller WSI-Pixel wird der Otsu Schwellenwert bestimmt. **D** Aus dem WSI werden Kacheln in der Größe ( $\sim 1500 \times 1500 \mu\text{m}^2$ ) in der höchsten Auflösung extrahiert. Der hier gezeigte Ausschnitt hat eine Größe von  $420 \times 420 \mu\text{m}^2$ . **E** Die Standardabweichungen der Pixelfarben wird berechnet um den global bestimmter Schwellenwert des Standardabweichens verwenden zu können. Dadurch werden Pixel in Vorder- und Hintergrund getrennt. **F** Das Bild wird in mehreren Schritten „gereinigt“. Kleine weiße Objekte ( $\leq 40 \mu\text{m}^2$ ), die sich im Vordergrund (i.e. im Gewebe) befinden werden entfernt, und ein binäres Schließen wird durchgeführt. Ein Hysteresis Algorithmus wird angewendet, um die wahren Grenzen der Fettobjekte, die durch die Binarisierung oft verkleinert werden, wiederherzustellen. Ein Watershed Algorithmus wird verwendet, um verbunden weiße Objekte zu trennen. **G** Erkannte weiße Objekte werden durch ihre morphologischen Merkmale z.B. Fläche ( $\geq 40 \mu\text{m}^2$  und  $\leq 10000 \mu\text{m}^2$ ), die Ausdehnung (Verhältnis Objektpixel zu Pixel des Begrenzungsrahmen) ( $\geq 0,5$ ), und Achsenverhältnis ( $\leq 2$ ) in „Fett“ oder „nicht-Fett“ klassifiziert. **H** Zellkerne werden durch das HoVer-Net detektiert [2]. Dazu werden die Kumar Gewichte verwendet [3]. **I** Die Position der erkannten Zellkerne wird verwendet, um einen KD-Baum zu bilden. Durch diesen Baum kann für jeden Zellkern benachbarte Zellkernen innerhalb einer bestimmten Distanz ( $15 \mu\text{m}$ ) bestimmt werden. **J** Diese Nachbarschaftsinformationen kann zur Analyse der verbundenen Komponentengruppen von dichten Zellkernen benutzt werden. Gruppen mit  $\geq 3$  Zellkernen werden als dichte Region klassifiziert.

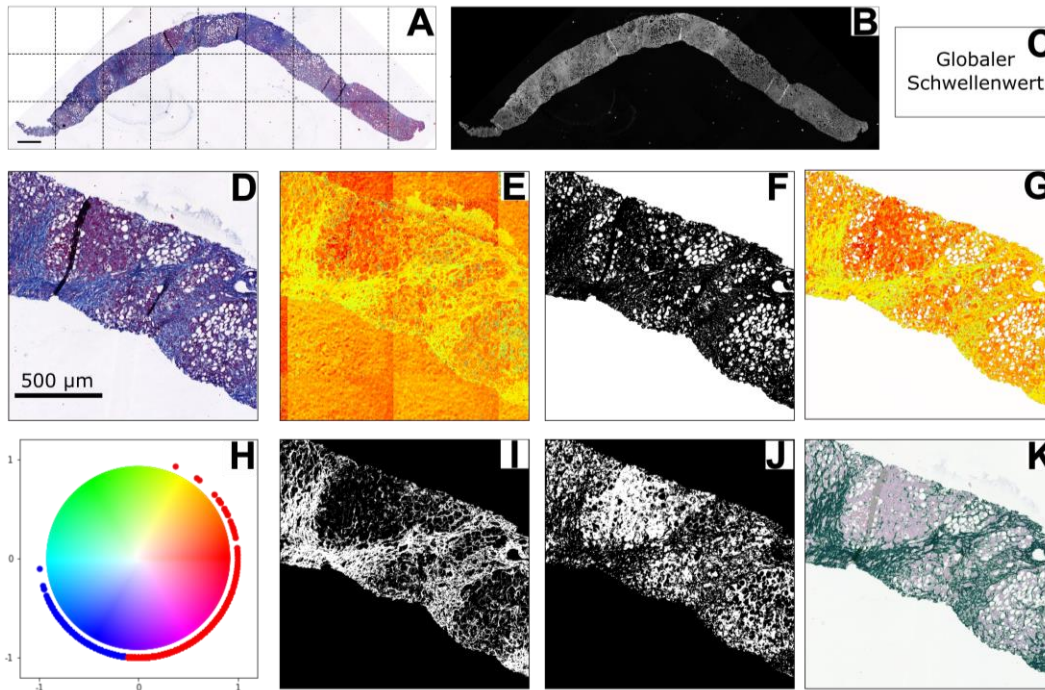

**Abb. S3: Übersicht Kollagenproportionale Areal (CPA) Erkennung von Massen-Trichom WSI.** **A** Das gesamte WSI wird als RGBA-Bild in einer Auflösung von  $\sim 4,5 \mu\text{m}/\text{Pixel}$  geöffnet. Anschließend wird das gesamte WSI in der höchsten Auflösung in Kacheln geteilt (siehe Schritt D). Die in **A** dargestellte Maßstableiste zeigt  $1000 \mu\text{m}$  an. **B** Das WSI wird in den HSV-Farbraum konvertiert, um Sättigungsinformation der Pixel (hier abgebildet) zu gewinnen. **C** Diese Sättigungsinformation der Pixel wird verwendet, um einen globalen Otsu Schwellenwert zu bestimmen. **D** Die höchste Auflösung der WSI wird in Kacheln der Größe  $\sim 1.500 \times 1.500 \mu\text{m}^2$  geteilt. Der hier gezeigte Ausschnitt hat eine Größe von  $210 \times 210 \mu\text{m}^2$ . **E** Die Kachel wird in den HSV-Farbraum konvertiert. **F** Der global bestimmter Schwellenwert wird auf Kachelebene angewendet. Dazu wird die Sättigungsinformation der Kachelpixel verwendet. Dadurch wird ein binäres Bild, bestehend aus Vorder- und Hintergrund produziert. Kleine Objekte im Hintergrund (kleine Gewebstücke, Artefakte etc.) werden entfernt. Wenn mindestens 1% der Bildfläche aus Vordergrundpixel (Gewebe) besteht, wird die Kachel weiterverarbeitet. Hierdurch werden relevante Gewebeflächen als Vordergrundpixel identifiziert. **G** Die Farbtoninformationen der im Schritt F erkannten Gewebeflächen wird als Grundlage für den K-means Algorithmus verwendet. **H** Im HSV-Farbraum wird Farbinformation als Grad ( $^\circ$ ) repräsentiert. Das bedeutet z.B., dass rote Farbtöne sich jeweils bei  $\sim 0^\circ$  und  $360^\circ$  befinden. Farbinformationen werden in den kartesischen Raum konvertiert, sodass ähnliche Farben beieinander liegen. Dann werden Pixel mittels dem K-means Algorithmus in  $k=2$  Gruppen aufgeteilt. Als Initialisierungspunkte wird jeweils ein Punkt im blauen und im roten Farbraum verwendet. Aufgrund der hohen Anzahl der Pixel wurde ein Downsampling für die Visualisierung durchgeführt. **I, J** Es wird pro Pixelgruppe eine binäre Maske generiert. Pixel der Gruppe 1 sind in **I** abgebildet, und Pixel der Gruppe 2 in **J**. **K** Um zu identifizieren, welche Gruppe die blauen Pixel repräsentiert, wird für jede Pixel in der Gruppe die Distanz zu dem initialen „blauen“ Punkt berechnet. Die Gruppe mit der kleinsten durchschnittlichen Distanz wird durch blaue Pixel identifiziert. Der Anteil des Kollagens wird berechnet, indem das Verhältnis zwischen blauen Pixeln durch die Gesamtpixel (inklusive Fettvakuolen, erkannt im analogen Prozess wie in Supp. Abb. 1 dargestellt, mit der Ausnahme von der Bestimmung des Schwellenwerts, welcher durch die Sättigungsinformation berechnet wird) gebildet wird.

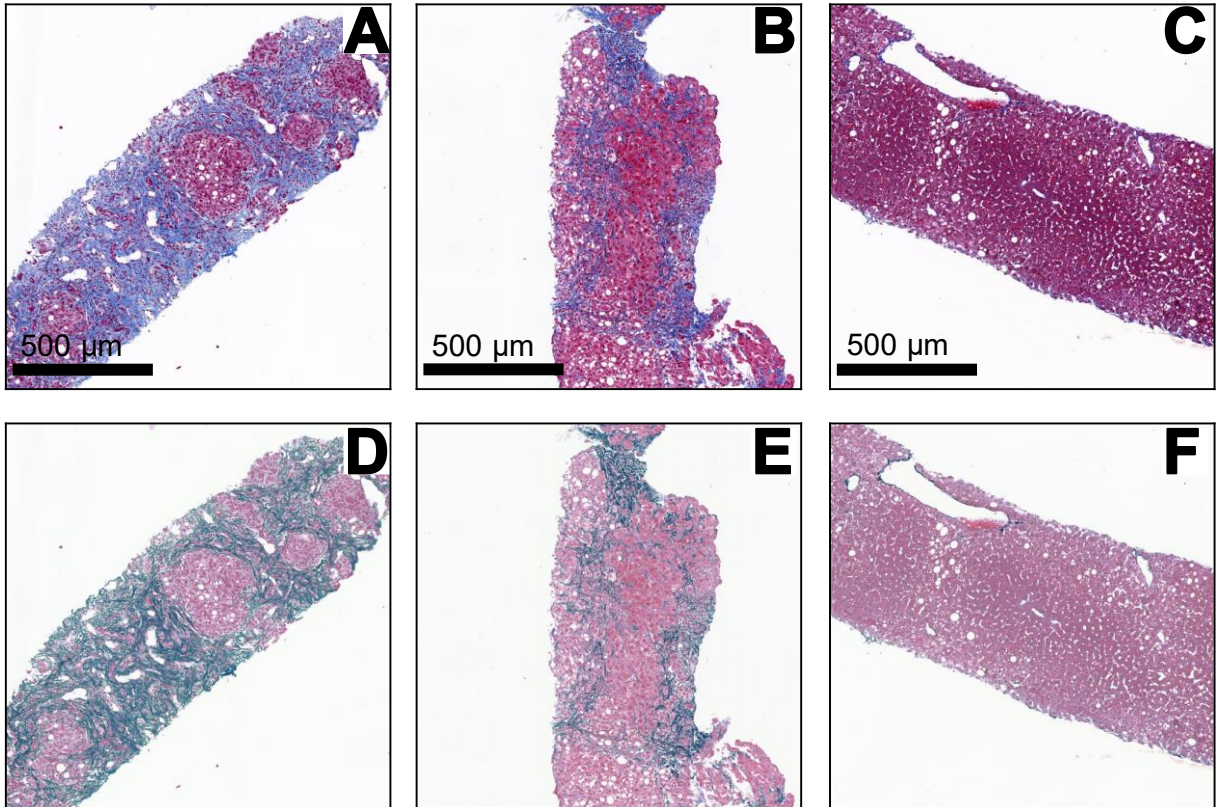

**Abb. S4: Beispiel der CPA-Berechnung.** **A, B** und **C** zeigen Ausschnitte von Masson-Trichrom gefärbten WSI. **D, E** und **F** heben Pixel, die kollagenhaltige Strukturen abbilden, in Grün hervor. **A** und **D** zeigen einen Ausschnitt eines stark fibrotisiertes WSI, **B** und **E** dagegen ein etwas weniger fibrotisiertes WSI. **C** und **F** stellen ein Ausschnitt eines WSI dar, der keine Fibrose, sondern nur kleine Stellen mit strukturellen Kollagen, aufweist.

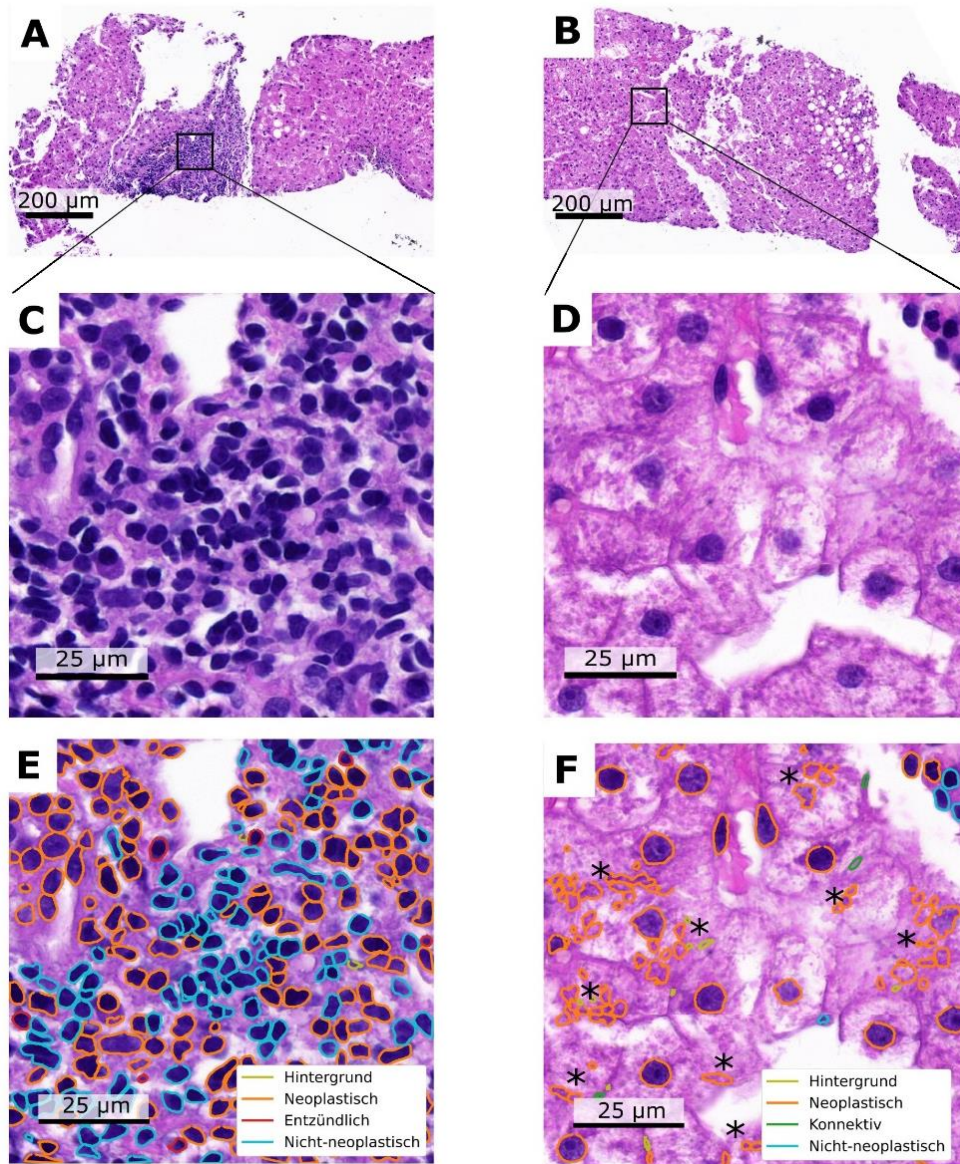

**Abb. S5: Fehlerhafte Zellkernklassifizierung und Segmentierung.** Das HoVer-Net bietet, z.B. unter Verwendung der PanNuke Gewichtungen, die Möglichkeit erkannte Zellkernen nach Zelltyp zu klassifizieren [1, 2]. Allerdings gab es bei der Anwendung dieser Funktion zahlreiche fehlerhafte Klassifizierungen und Übersegmentierungen. **A** und **B** zeigen Ausschnitte eines H&E gefärbte WSI. **C** und **D** stellen jeweils Vergrößerungen von Ausschnitten **A** und **B** dar, die in **E** und **F** unter Verwendung der PanNuke Gewichtungen segmentiert und klassifiziert wurden [1, 2]. Der vorhergesagte Zellkerntyp wird durch die farbliche Umrandung der Zellkerne angezeigt. Auffällig sind insbesondere fehlerhaften Zellklassifizierungen in **E**, sowie auch die zahlreichen granulozytäre, zytoplasmatische Anteile, die fälschlich als Zellkerne identifiziert wurden. Diese übersegmentierten Gebiete sind in **F** mit einem Stern (\*) markiert. Aus diesem Grund wurde für zellkernbasierten Methoden (Methoden III und IV) die Zellkernsegmentierung durch Anwendung der Kumar Gewichtungen durchgeführt, die allerdings keine Zellkernklassifikation ermöglicht.

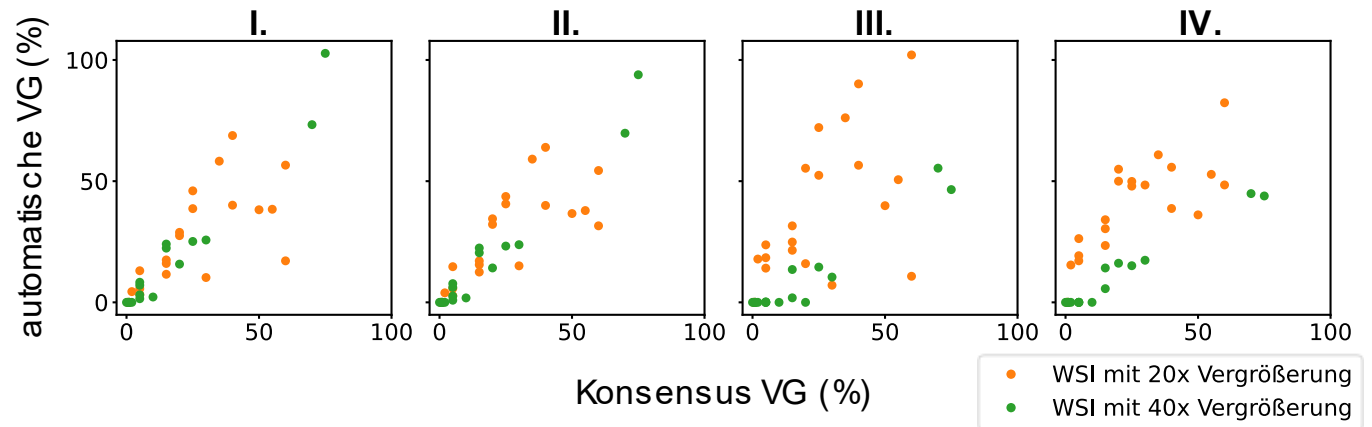

**Abb. S6: Einfluss der Vergrößerung.** Abgebildet ist das Verhältnis zwischen automatisch bestimmten VG und Konsensus VG für Methoden I bis IV. Die Vergrößerung der WSI wird durch die Farbe des Punktes angegeben.

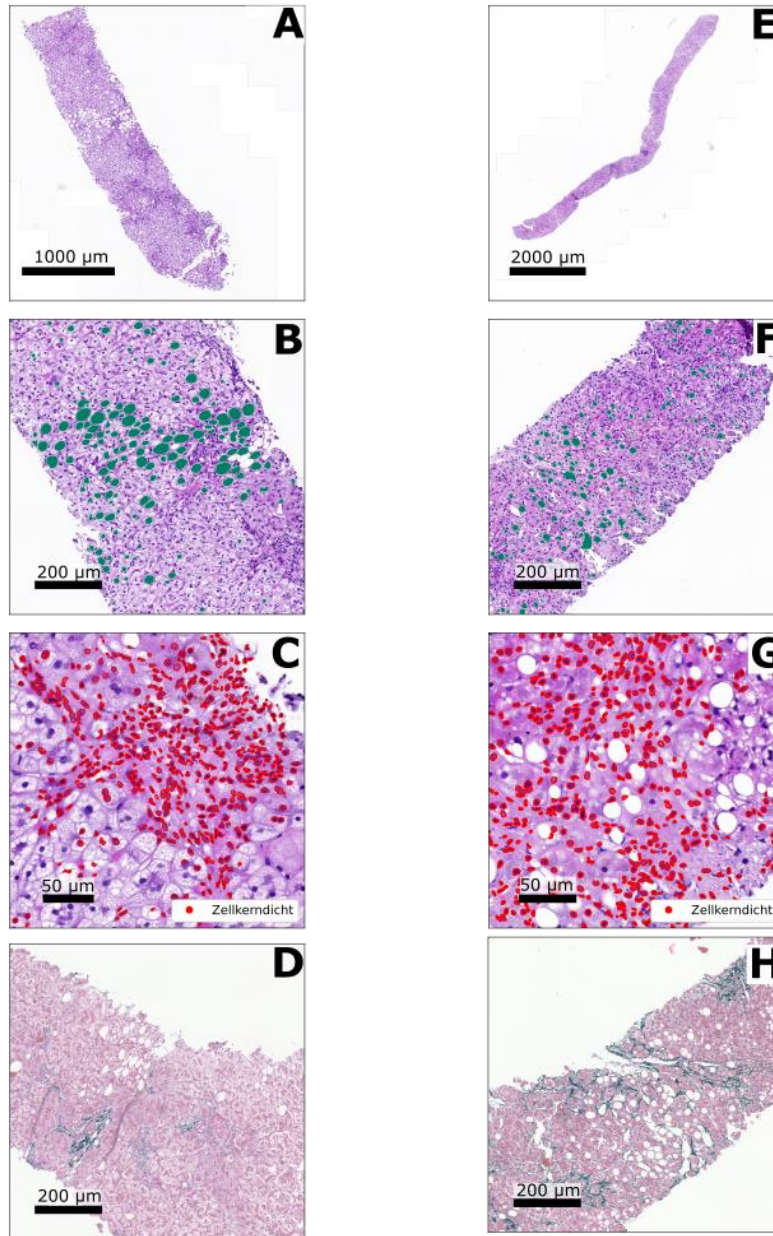

**Abb. S7: Vergleich der Verarbeitung mit unterschiedlichen Vergrößerungen.** Hier werden Schritte der Bildverarbeitung für 20x (links) und 40x (rechts) vergrößerte WSI exemplarisch dargestellt. Dabei zeigen **A & E** die unbearbeiteten WSI-Ausschnitte, **B & F** die Fetterkennung (erkannte Fettvakuolen sind Grün markiert), **C & G** die Zellkernerkennung, und **D & H** die CPA-Bestimmung (erkannte Fibrose in Grün hervorgehoben)

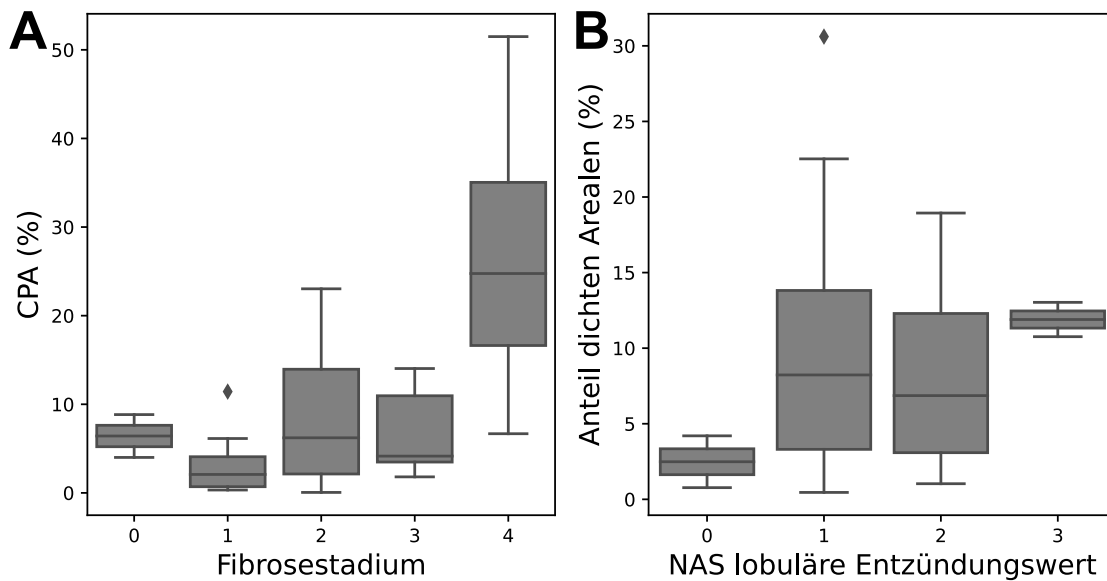

**Abb. S8: Beziehung zu weiteren histologischen Merkmalen.** Dabei werden Fibrosestadium und NAS lobuläre Entzündungswerte aus der Originalbefundungen entnommen. **A** zeigt das Verhältnis zwischen Fibrose Stadium (wobei Stadien 1a, b, und c zu Stadium 1 zusammengefasst werden) und CPA (Spearman Rho = 0,44, p = 0,005). **B** zeigt das Verhältnis zwischen dem Anteil der Gewebefläche, dass durch dichtbesiedelte Zellkerne gebildet wird, und dem NAS lobulärer Entzündungswert (Spearman Rho = 0,29, p = 0,065). Um den Anteil dichter Arealen zu bestimmen wird ein konvexes Vieleck um Zellkerne in dicht besiegelte Gruppen mit  $\geq 3$  Zellkernen gebildet. Die Gewebeflächen (ohne Fettflächen) die sich innerhalb dieser Vielecke befinden wird summiert und in Verhältnis zur Gesamtfläche gesetzt.



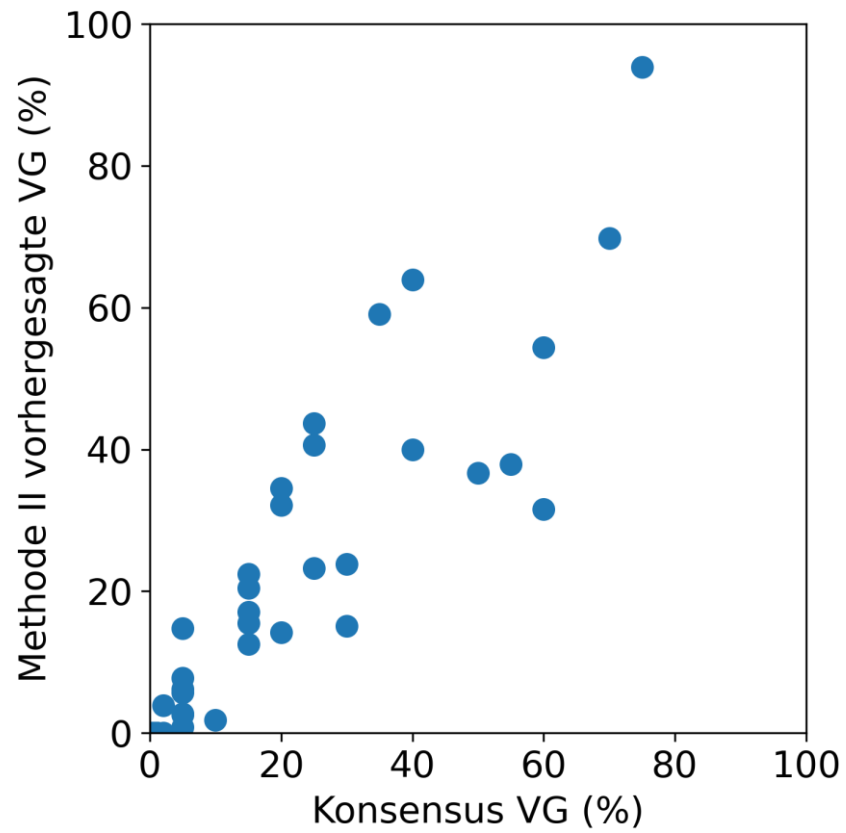

**Abb. S9: Vorhergesagte VG der Methode II.** Die vorhergesagten VG stellen dabei die durch die lineare Regression umgerechnete Werte dar.

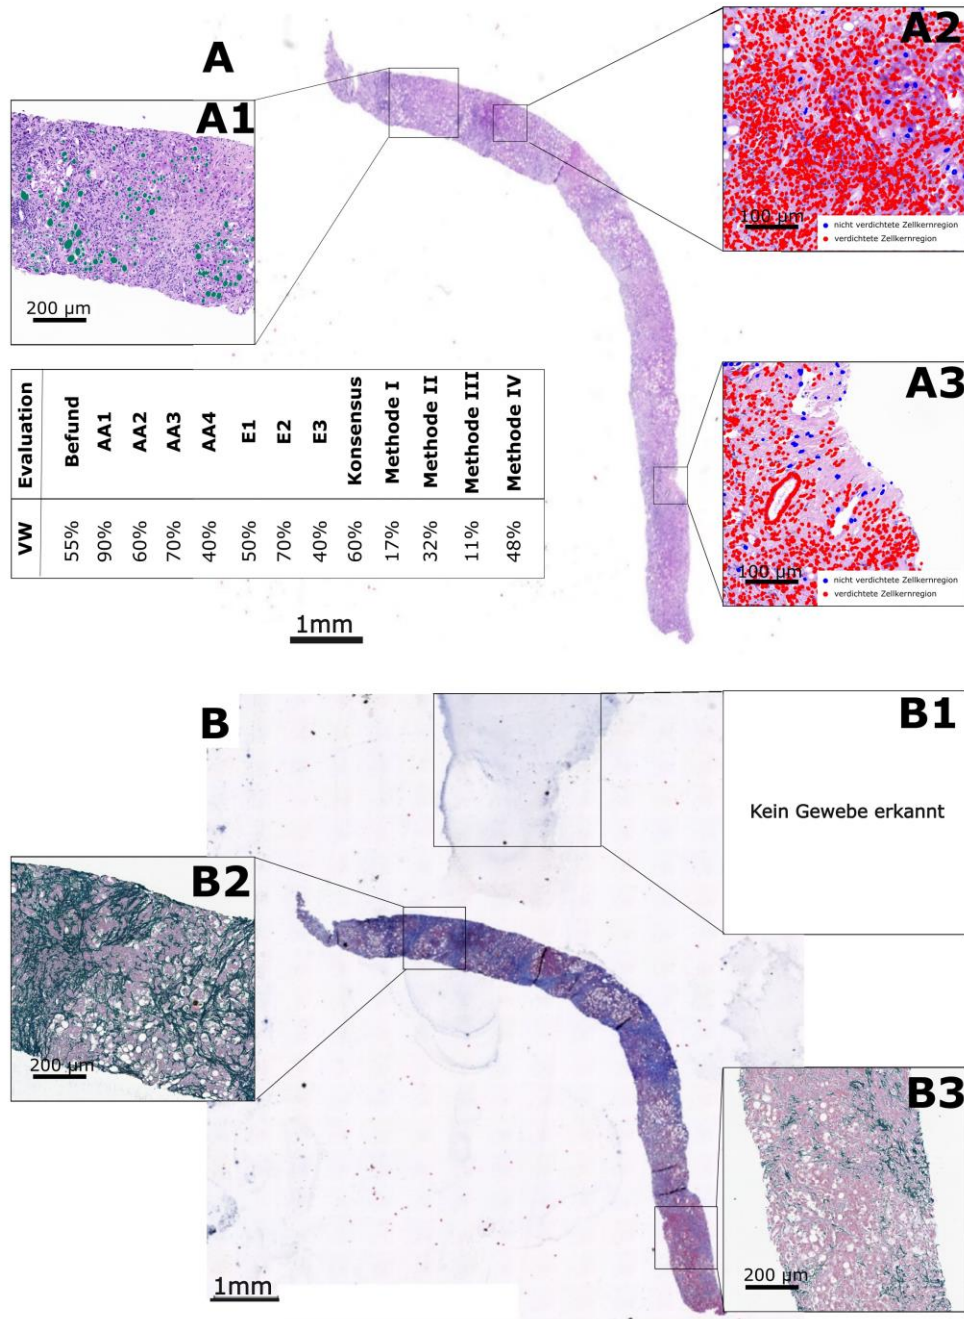

**Abb. S10: WSI mit der größten absoluten Differenz (%) zum Konsensus VG.** Um eine übersichtliche Visualisierung zu gewährleisten, werden hier Ausschnitte des WSIs gezeigt. **A** zeigt das H&E gefärbte WSI, **B** das Masson-Trichrom gefärbte WSI. **A1** zeigt erkannte Fettvakuolen in Grün an. **A2** und **A3** zeigen die Zellkernanalyse. Blaue Konturen zeigen Zellkerne in Hepatozyten-ähnliche Verteilung, während rote Konturen Zellkerne in dichten Arealen markieren. **B1**, **B2** und **B3** zeigen die CPA an, wobei bei **B1** keine Analyse durchgeführt wurde, weil keine ausreichende Gewebefläche erkannt wurde. Fibrotische Areale werden in Grün hervorgehoben.

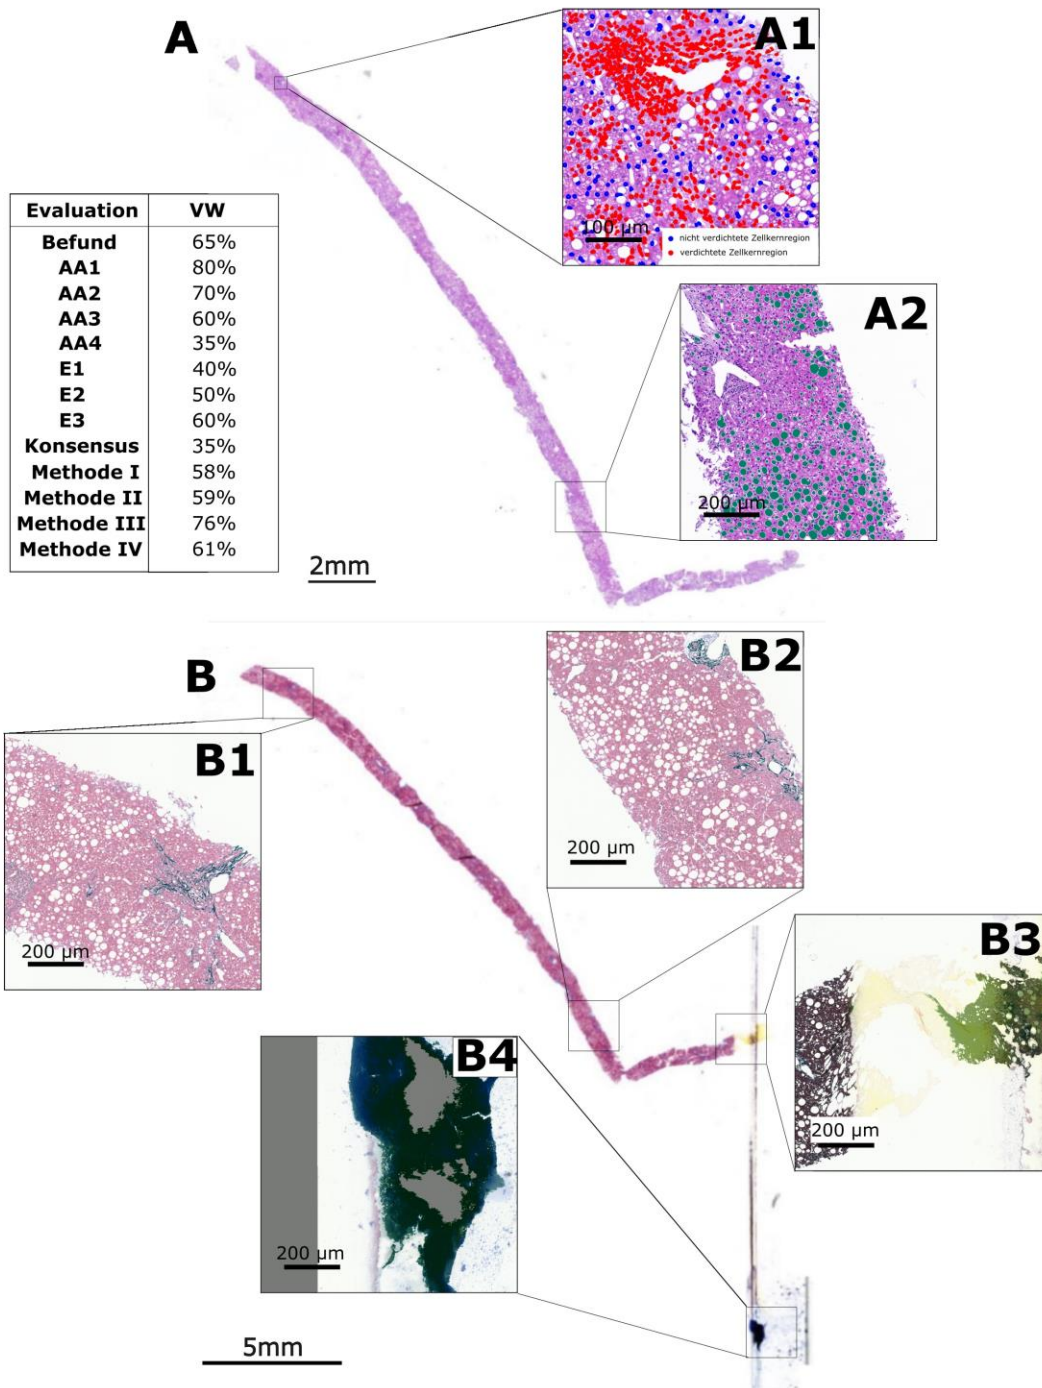

**Abb. S11: WSI mit der zweitgrößten absoluten Differenz (%) zum Konsensus VG.** Um eine übersichtliche Visualisierung zu gewährleisten werden hier Ausschnitte des WSIs gezeigt. **A** zeigt das H&E gefärbte WSI, **B** das Masson-Trichrom gefärbte WSI. **A1** zeigt die Zellkernanalyse. Blaue Konturen zeigen Zellkernen in Hepatozyten-ähnliche Verteilung, während rote Konturen Zellkerne in dichten Arealen markieren. **A2** zeigt erkannte Fettvakuolen in Grün an. **B1-B4** zeigen die CPA an, wobei fibrotische Areale in Grün hervorgehoben werden. **B3** und **B4** zeigen Areale mit Färbungsartefakte, wobei große Flächen fälschlich als Fibrose erkannt wurden. In **B4** werden nicht-eingescannte Areale in Grau gezeigt.

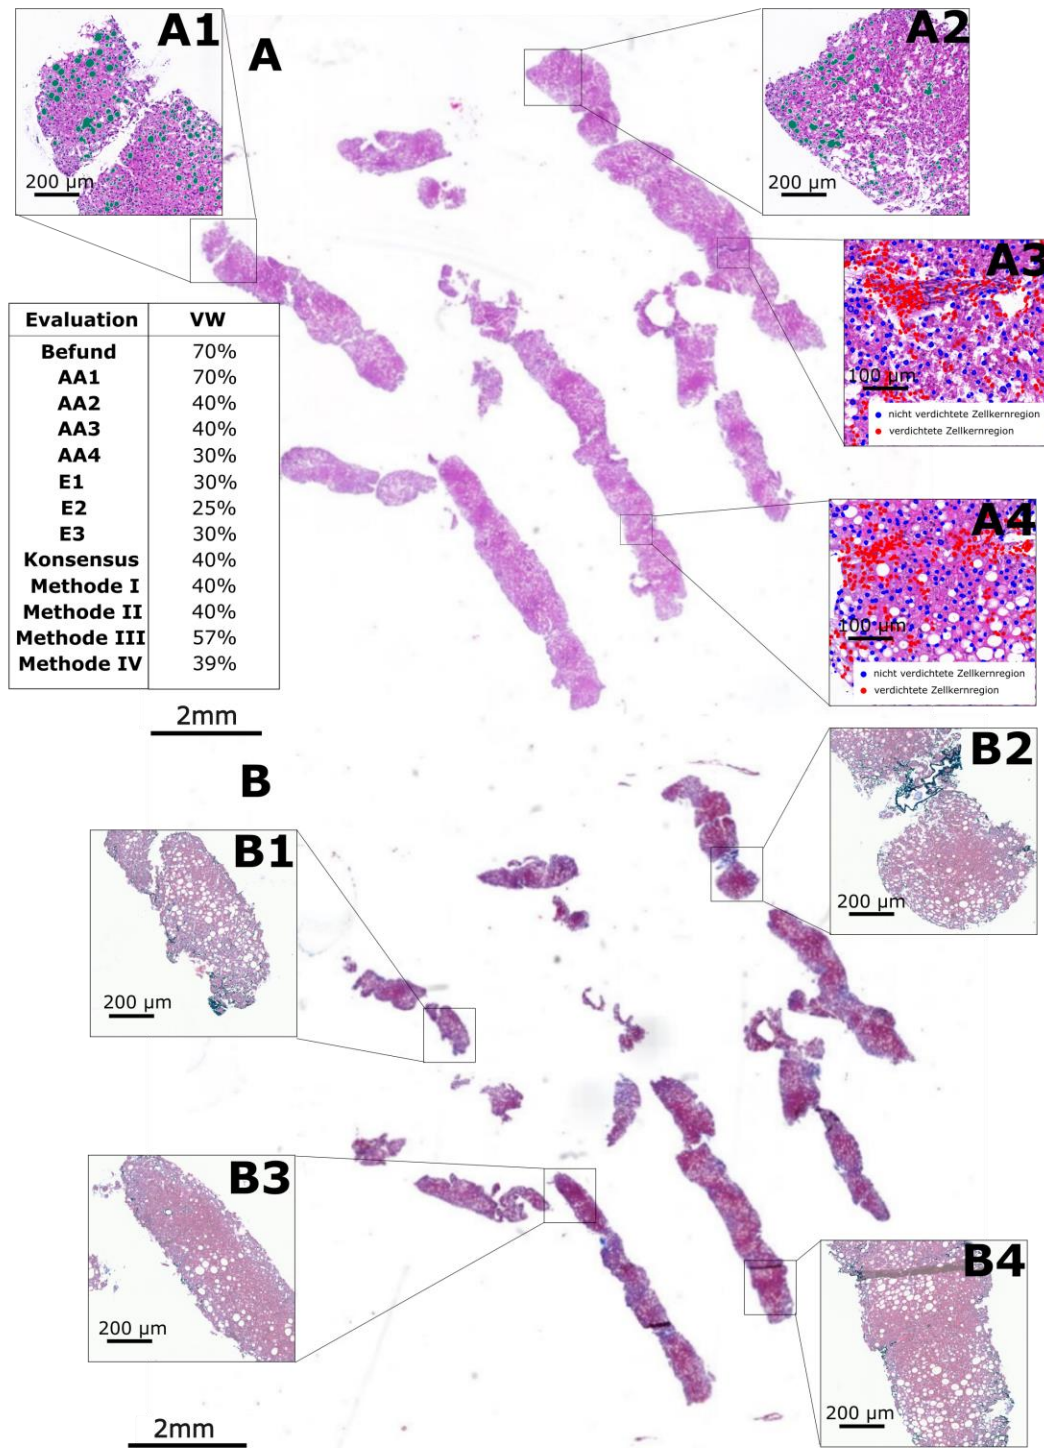

**Abb. S12: WSI mit der kleinsten absoluten Differenz (%) zu Konsensus VG.** Um eine übersichtliche Visualisierung zu gewährleisten werden hier Ausschnitte des WSIs gezeigt. **A** zeigt das H&E gefärbte WSI, **B** das Masson-Trichrom gefärbte WSI. **A1** und **A2** zeigen erkannte Fettvakuolen in Grün an. **A3** und **A4** zeigen die Zellkernanalyse. Blaue Konturen zeigen Zellkernen in Hepatozyten-ähnliche Verteilung, während rote Konturen Zellkerne in dichten Arealen markieren. **B1-B4** zeigen die CPA an, wobei fibrotische Areale in Grün hervorgehoben werden.

## Weitere Information

Der Quellcode wird unter diesem Link zur Verfügung gestellt: <https://github.com/Je55ie555/steatosis-quantification>

## Literatur

1. Gamper J, Koohbanani NA, Benes K et al. (2020) PanNuke Dataset Extension, Insights and Baselines.
2. Graham S, Vu QD, Raza SEA et al. (2019) Hover-Net: Simultaneous segmentation and classification of nuclei in multi-tissue histology images. *Medical Image Analysis* 58:101563
3. Kumar N, Verma R, Sharma S et al. (2017) A Dataset and a Technique for Generalized Nuclear Segmentation for Computational Pathology. *IEEE Trans. Med. Imaging* 36:1550-1560
